# Supplementary material for: Giant tunnelling electroresistance through 2D sliding ferroelectric materials
Source: Royal Society of Chemistry journal article supplement (doi:10.1039/d2mh00080f), 2022-01-01
Supplement: d2mh00080f1.pdf [file d2mh00080f1.pdf]

## Supporting Information:

# Giant Tunnelling Electroresistance through 2D Sliding Ferroelectric Materials

Jie Yang,<sup>1,2</sup> Jun Zhou,<sup>3</sup> Jing Lu,<sup>1,4,5,6</sup> Zhaochu Luo,<sup>1</sup> Jinbo Yang,<sup>1,4,5,6,†</sup> and Lei Shen<sup>2,\*</sup>

<sup>1</sup> State Key Laboratory for Mesoscopic Physics and School of Physics, Peking University, Beijing 100871, P. R. China

<sup>2</sup> Department of Mechanical Engineering, National University of Singapore, 9 Engineering Drive 1, Singapore 117575, Singapore

<sup>3</sup> Institute of Materials Research & Engineering, A\*STAR (Agency for Science, Technology and Research), 2 Fusionopolis Way, Innovis, Singapore 138634, Singapore

<sup>4</sup> Collaborative Innovation Center of Quantum Matter, Beijing 100871, P. R. China

<sup>5</sup> Beijing Key Laboratory for Magnetoelectric Materials and Devices (BKL-MEMD), Peking University, Beijing 100871, P. R. China

<sup>6</sup> Peking University Yangtze Delta Institute of Optoelectronics, Nantong 226010, P. R. China

Email: [†jbyang@pku.edu.cn](mailto:jbyang@pku.edu.cn); [\\*shenlei@nus.edu.sg](mailto:shenlei@nus.edu.sg)

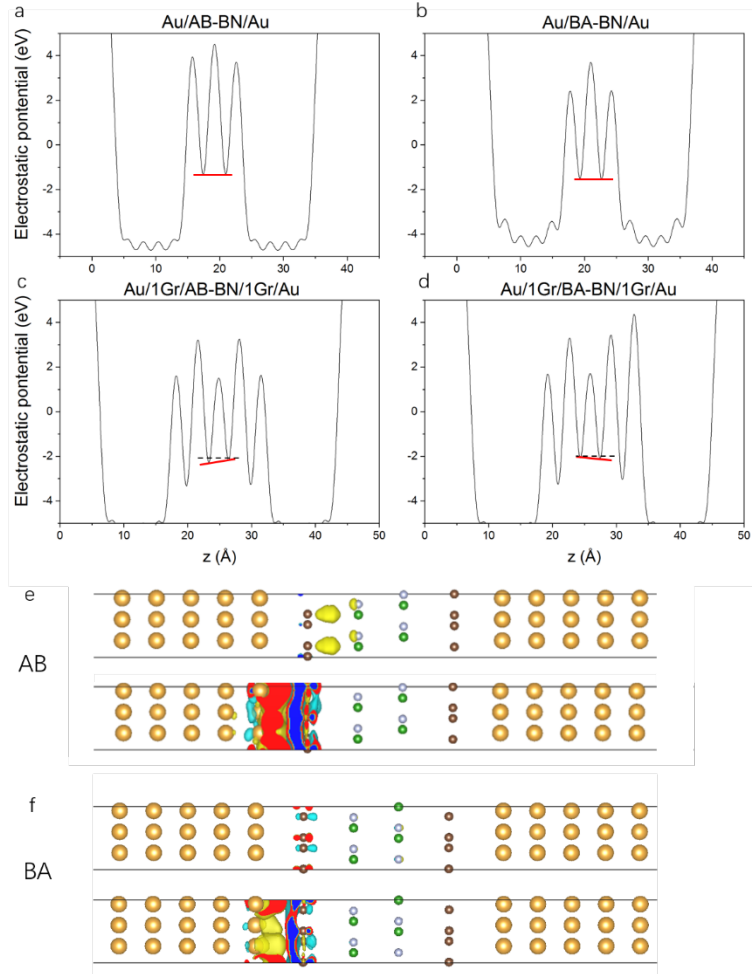

**Figure S1.** Planar averaged macroscopic electrostatic potential in the *AB*-stack configurations without (a) and with (c) monolayer graphene. (b) and (d) are the same with (a) and (c) but for the *BA*-stack configurations. The red lines connect the potentials of two BN layers. Charge density difference in graphene/BN interface and Au/graphene interface for the *AB*- (e) and *BA*-stack (f) cases.

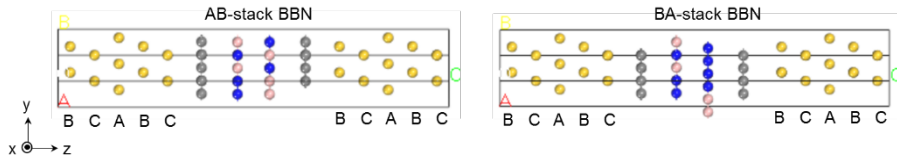

**Figure S2.**  $yz$  plane side views of graphene intercalated device configuration of bilayer *h*-BN with *AB* and *BA* arrangements. Two Au (111) electrodes are mirror asymmetric.

It's worth mentioning that the I-V curve is nonlinear for the Au/BBN/Au FTJs because of the Schottky-type Au/BBN interface. The linear I-V curve shown in Fig. 2a in the main text only occurs under small bias. As the bias continuously increases, the output will show a typical Schottky-type character (Fig. S2). Notice that the current differences among the AA-, AB-, and BA-stack FTJs are still very small under a big bias of 5 V.

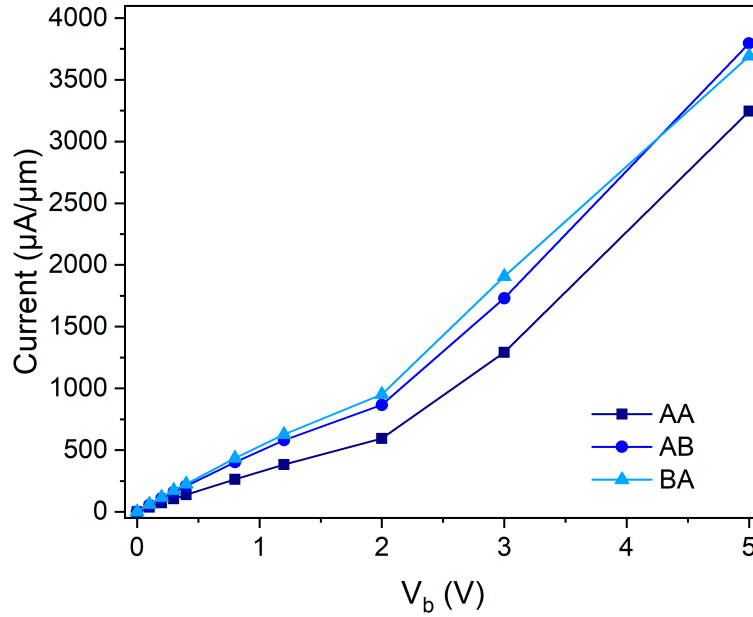

**Figure S3.** I-V output of the Au/BBN/Au ferroelectric tunnel junctions with different stack types.

**Table S1.** Summary of work functions of  $M$  ( $M = \text{Au}, \text{Au/Gr}$ ),  $\Delta V$ ,  $E_v$ ,  $\Phi_p^W$ , and  $\Phi_p^{QT}$  in eV.

$\Phi_p^W$  and  $\Phi_p^{QT}$  is the Schottky barrier height calculated by the work-function approximation and quantum transport calculation.

| $M$   | $W_M$             | $W_{M BN}$        | $\Delta V$ | $E_v$             | $\Phi_p^W$        | $\Phi_p^{QT}$ |
|-------|-------------------|-------------------|------------|-------------------|-------------------|---------------|
| Au    | 5.58 <sup>a</sup> | 4.92 <sup>a</sup> | 0.70       | 6.04 <sup>a</sup> | 1.12 <sup>a</sup> | 1.50          |
| Au/Gr | 4.80 <sup>b</sup> | 4.94              | -0.14      | 6.04 <sup>a</sup> | 1.10              | 1.70          |

<sup>a</sup>Reference;<sup>1</sup> <sup>b</sup>Reference.<sup>2</sup>

**Table S2.** Conductance of BBN SFTJs with different electrodes.

|                 | Au electrode                                                                        | Graphite electrode                                                                   |
|-----------------|-------------------------------------------------------------------------------------|--------------------------------------------------------------------------------------|
| Device model    | 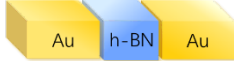 |  |
| $G_{AB}(e^2/h)$ | $3.83 \times 10^{-3}$                                                               | $1.62 \times 10^{-7}$                                                                |
| $G_{BA}(e^2/h)$ | $4.13 \times 10^{-3}$                                                               | $4.00 \times 10^{-7}$                                                                |

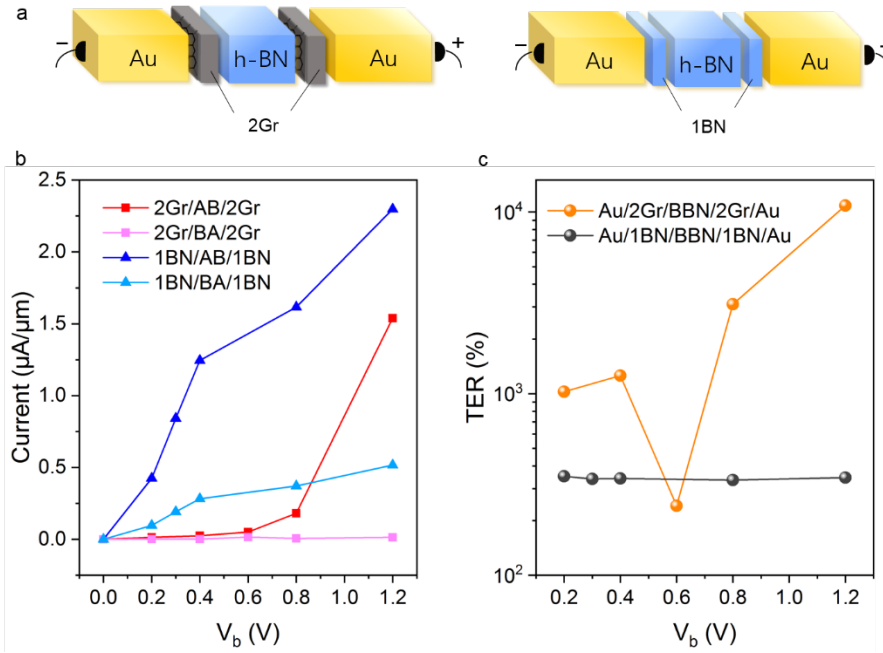

**Figure S4.** (a) BBN sliding ferroelectric tunnel junctions with bilayer graphene and monolayer BN intercalation. (b-c) IV output and TER of the Au/2Gr/h-BN/2Gr/Au and Au/1BN/h-BN/1BN/Au ferroelectric tunnel junctions with different stack types.

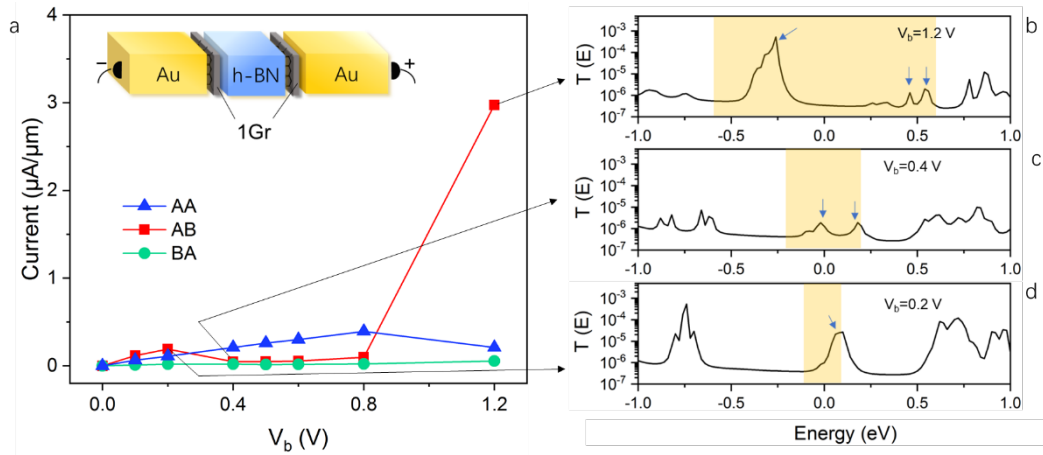

**Figure S5.** (a) I-V outputs of bilayer *h*-BN ferroelectric tunnel junctions with monolayer graphene intercalation (Au/1Gr/BBN/1Gr/Au). (b-c) Transmission spectra of Au/1Gr/BBN/1Gr/Au FTJs in AB stacking under a bias of 1.2, 0.4, and 0.2 V, respectively. The yellow zone represents the size of the bias window. The blue arrows in the bias window point to main transmission peaks that contribute to the total current.

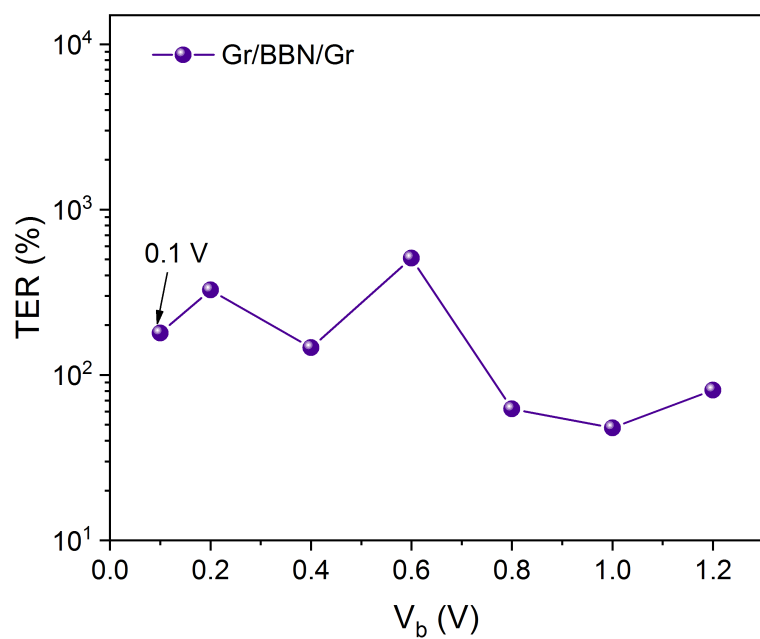

**Figure S6.** IV output (a) and TER (b) of the BBN sliding ferroelectric tunnel junctions with pure graphite electrodes.

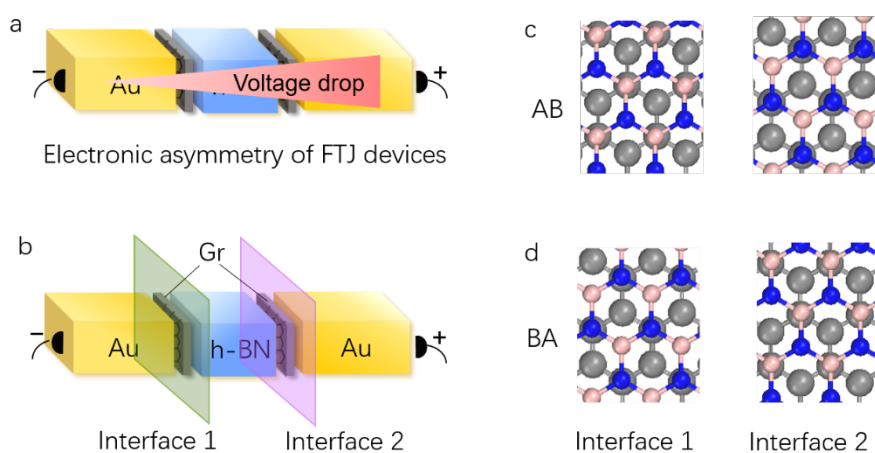

**Figure S7.** (a) Electronic asymmetric FTJs with bias. (b-d) Two Gr/BN interfaces in the AB- (c) and BA-stack (d) Au/Gr/BBN/Gr/Au FTJs.

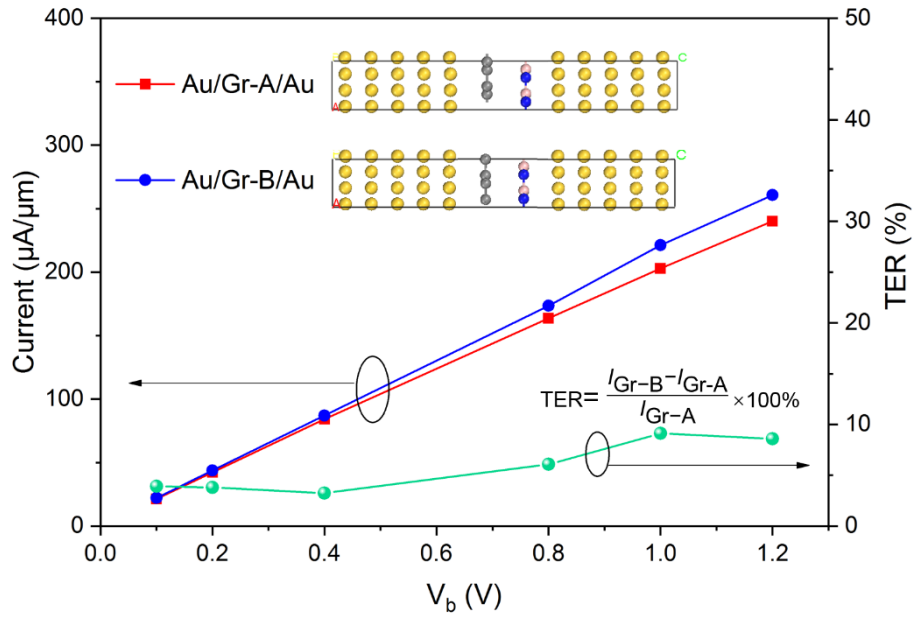

**Figure S8.** IV-curves and TER induced by the contact displacement (see the two in-plane geometries of Gr/BN in Figure S6c) in the Au/1Gr/1BN/Au tunnel junctions.

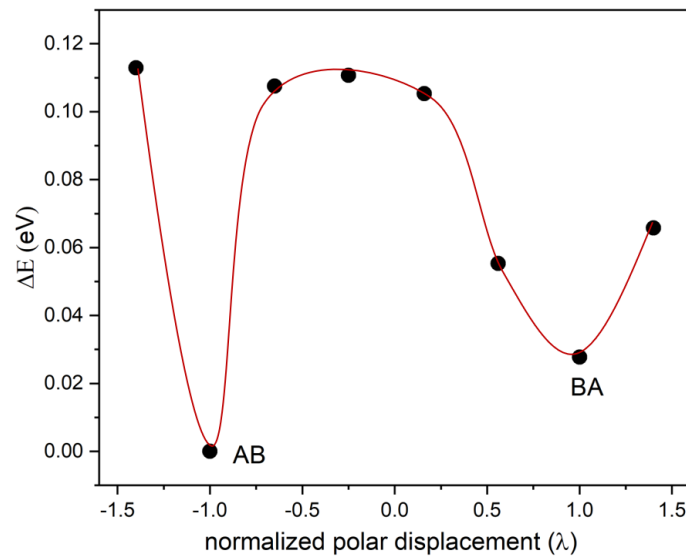

**Figure S9.** Energy profile as a function of polar displacement in the Au/Gr/BBN/Gr/Au FTJs. The polar displacements  $\lambda$  are normalized and  $\lambda=1$  and  $-1$  represent the AB and BA stacks, respectively. The energy of the AB-stack FTJ refers to zero.

### References:

- [1] Bokdam, M., Brocks, G., Katsnelson, M. I. & Kelly, P. J. Schottky barriers at hexagonal boron nitride/metal interfaces: A first-principles study. *Phys. Rev. B* **90**, 085415, doi:10.1103/PhysRevB.90.085415 (2014).
- [2] Wang, Y. *et al.* Schottky barrier heights in two-dimensional field-effect transistors: from theory to experiment. *Rep. Prog. Phys.* **84**, 056501, doi:10.1088/1361-6633/abf1d4 (2021).
